# Supplementary material for: Deformable Nanovesicles Synthesized through an Adaptable Microfluidic Platform for Enhanced Localized Transdermal Drug Delivery
Source: PubMed Central journal article supplement (PMC5396447; doi:10.1155/2017/4759839), 2017-04-05

Supplementary Figures

Supplementary Figure 1.

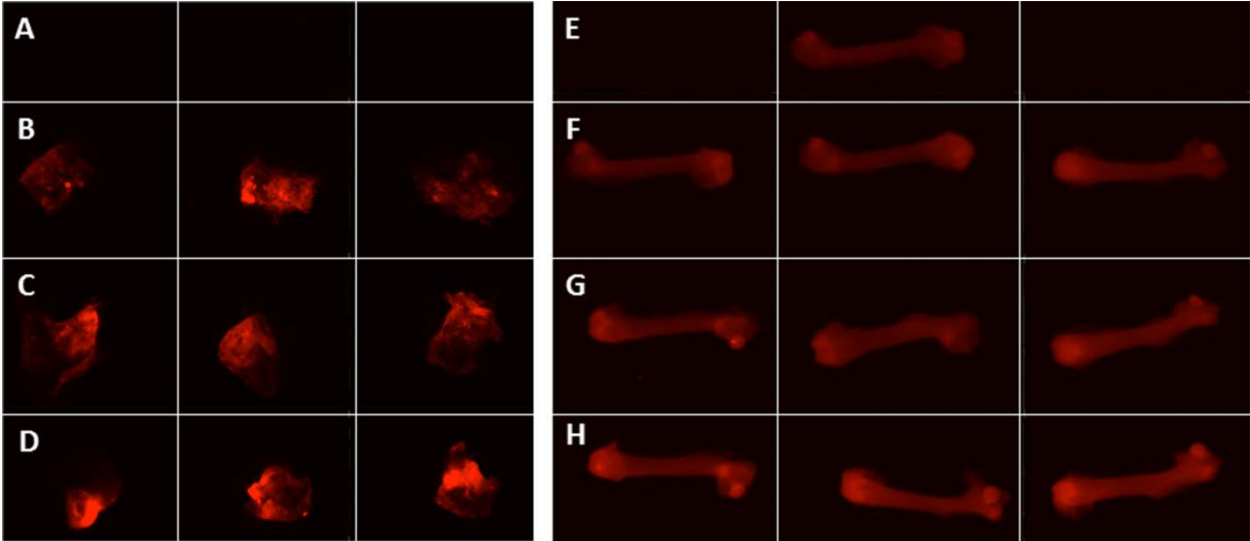

Supplementary Figure 2.

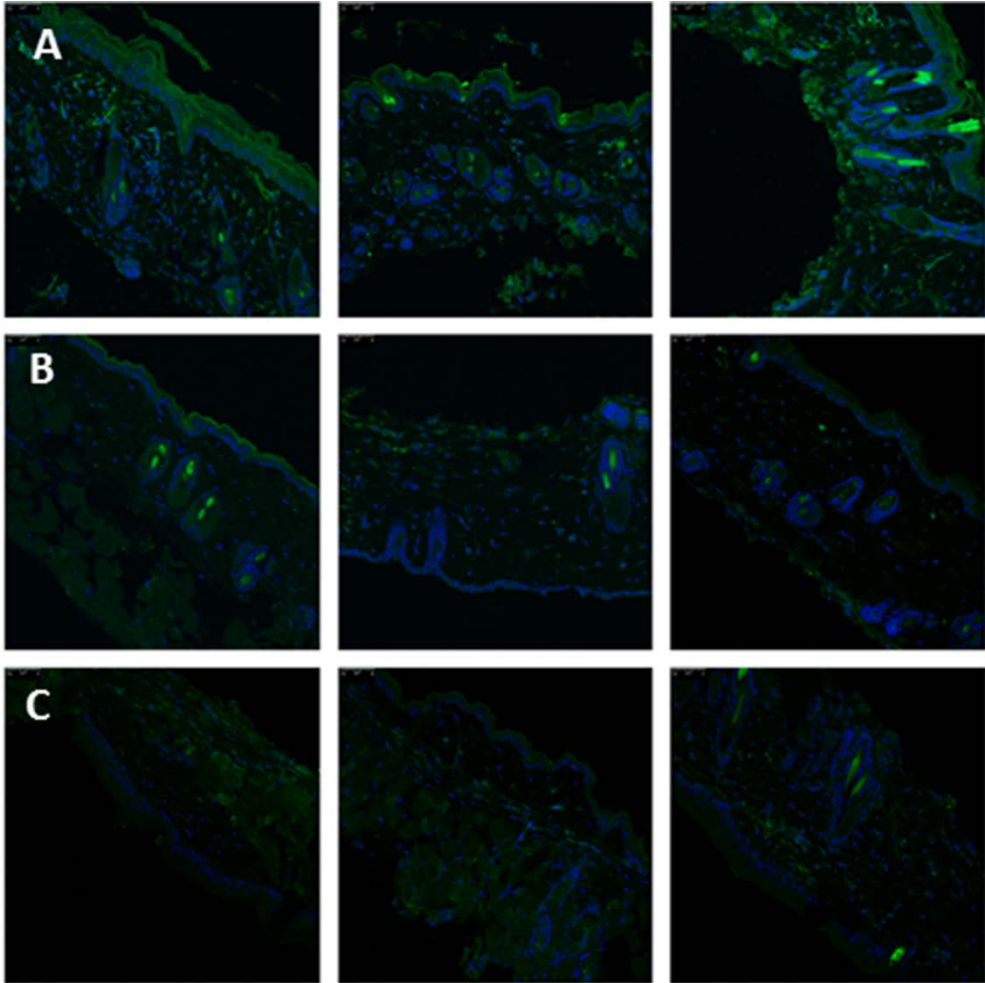

Supplementary Figure 3

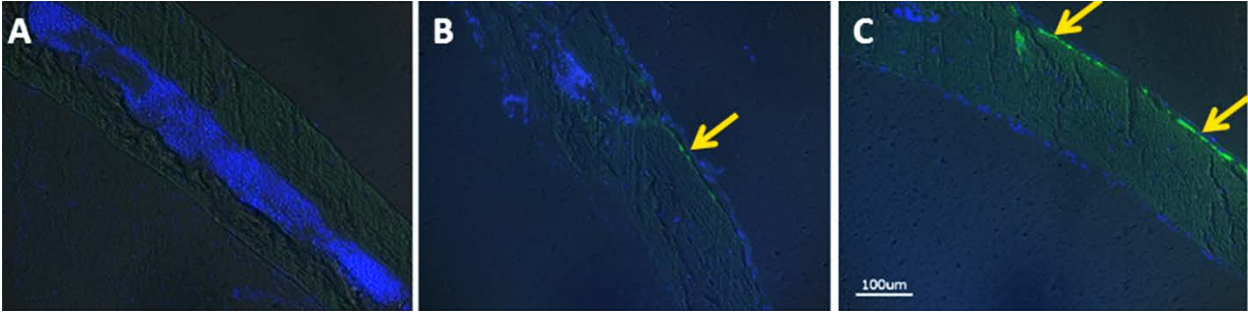

Supplement: 4759839.f1.pdf [file 4759839.f1.pdf]
